# Supplementary material for: Controllable fabrication of CoNi bimetallic alloy for high-performance electromagnetic wave absorption
Source: Royal Society of Chemistry journal article supplement (doi:10.1039/d3ra08896k), 2024-01-01
Supplement: d3ra08896k1.pdf [file d3ra08896k1.pdf]

## Electronic Supplementary Information (ESI)

### Controllable fabrication of CoNi bimetallic alloy for high-performance electromagnetic wave absorption†

Hai Xie,<sup>abc</sup> Jinmei Li,<sup>ac</sup> Rui Yang,<sup>ac</sup> Juan Yang,<sup>d</sup> Tingmei Wang<sup>\*abc</sup> and Qihua Wang<sup>\*abc</sup>

<sup>a</sup> *Key Laboratory of Science and Technology on Wear and Protection of Materials, Lanzhou Institute of Chemical Physics, Chinese Academy of Sciences, Lanzhou, 730000, China*

<sup>b</sup> *Center of Materials Science and Optoelectronics Engineering, University of Chinese Academy of Sciences, Beijing, 100049, China*

<sup>c</sup> *State Key Laboratory of Solid Lubrication, Lanzhou Institute of Chemical Physics, Chinese Academy of Sciences, Lanzhou, 730000, China*

<sup>d</sup> *Laboratory of Clean Energy Chemistry and Materials, State Key Laboratory of Solid Lubrication, Lanzhou Institute of Chemical Physics, Chinese Academy of Sciences, Lanzhou, 730000, China*

\*Corresponding author, E-mail address: tmwang@licp.cas.cn (T. Wang), wangqh@licp.cas.cn

(Q.

Wang).

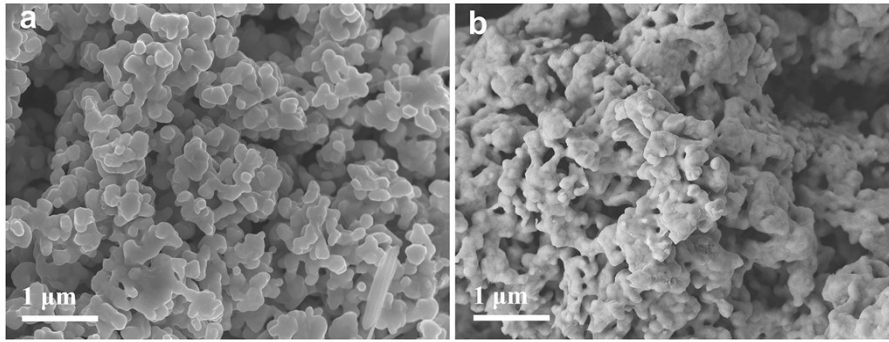

**Fig. S1.** SEM images of (a)  $\text{Co}_3\text{Ni}/\text{C}$  and (b)  $\text{CoNi}_3/\text{C}$ .

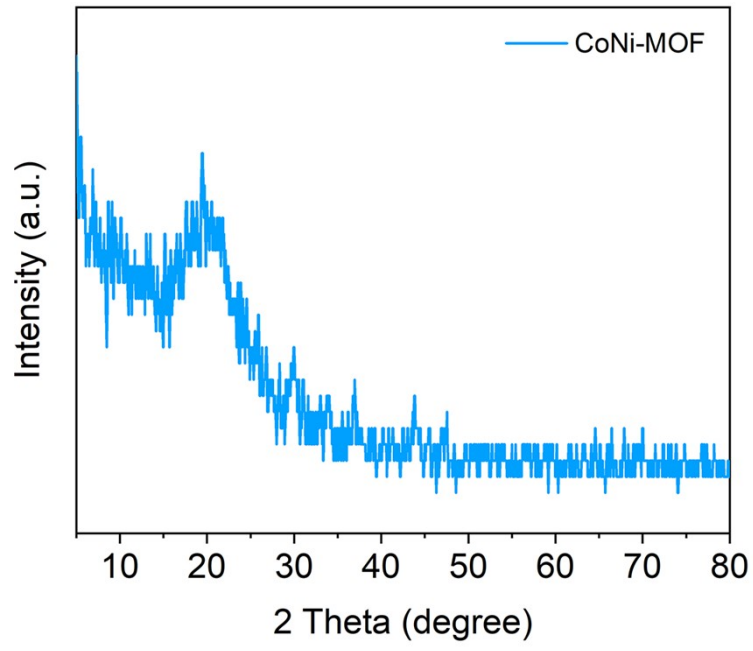

**Fig. S2.** XRD pattern of CoNi-MOF.

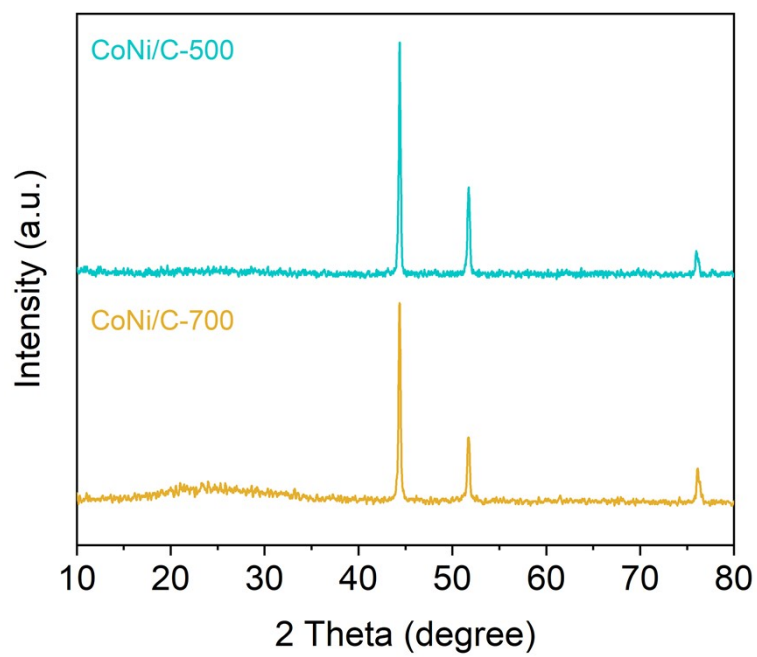

**Fig. S3.** XRD patterns of CoNi/C-500 and CoNi/C-700.

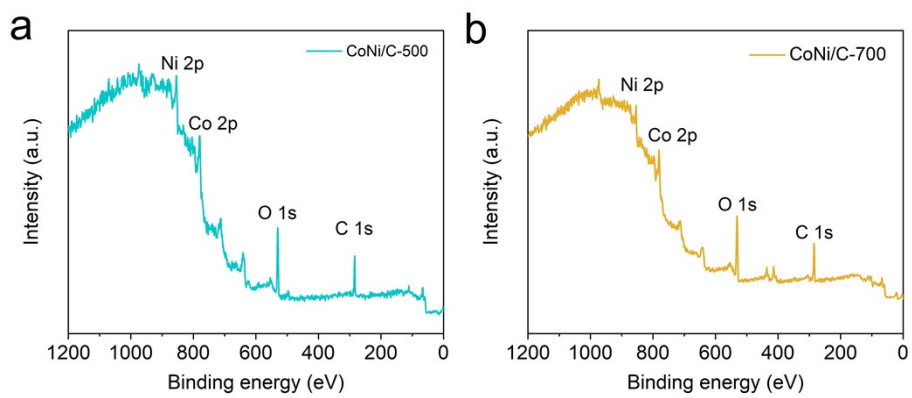

**Fig. S4.** XPS survey spectra of (a) CoNi/C-500 and (b) CoNi/C-700.

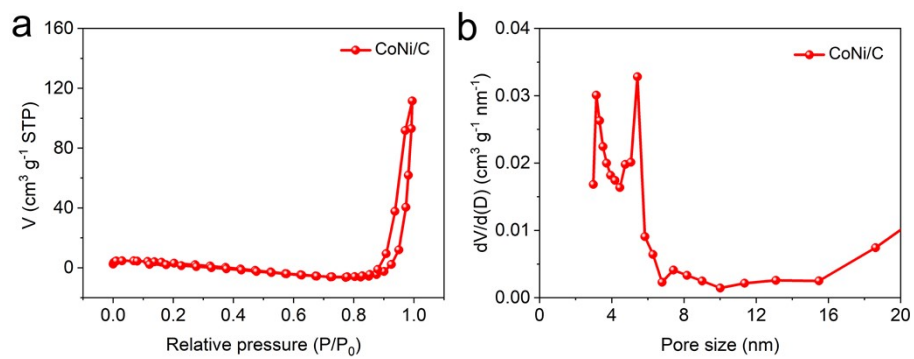

**Fig. S5.** (a) Nitrogen adsorption-desorption isotherms of CoNi/C. (b) The corresponding BJH pore size distribution curve.

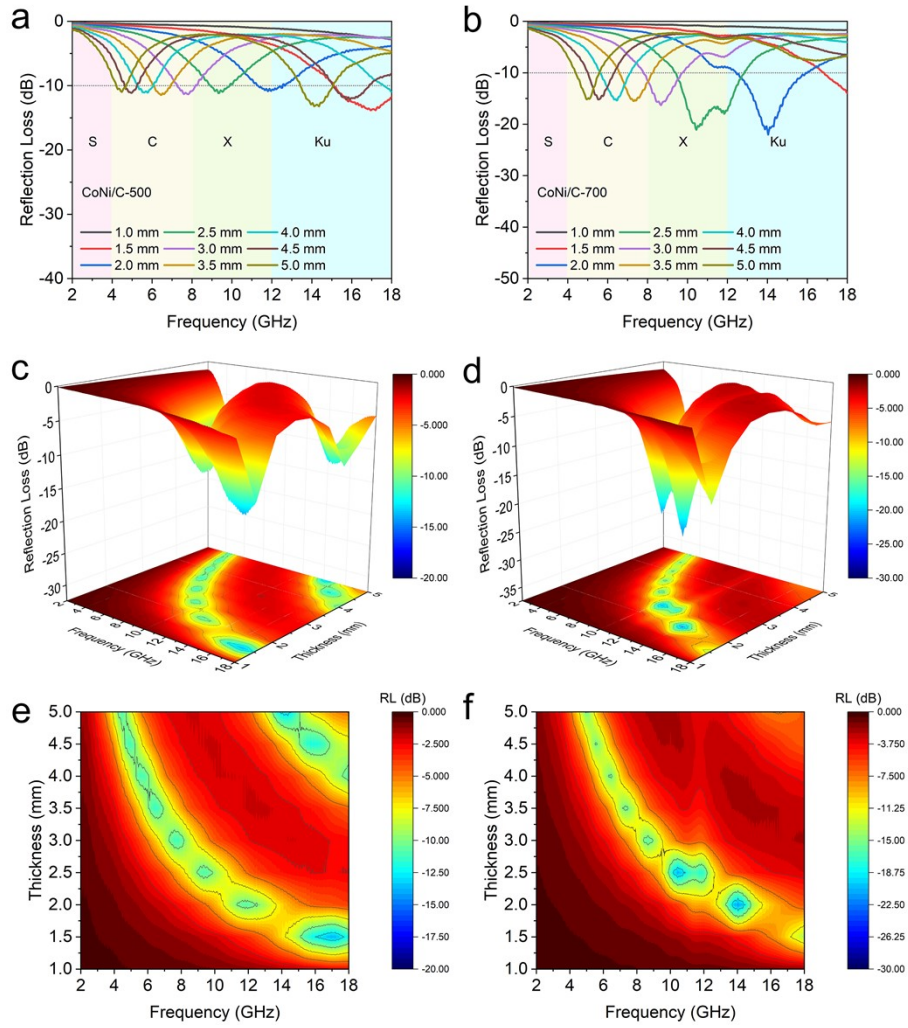

**Fig. S6.** Calculated RL curves at different thicknesses of (a) CoNi/C-500 and (c) CoNi/C-700.

The corresponding three-dimensional (3D) and contour RL representations of (c,e) CoNi/C-500 and (d,f) CoNi/C-700.

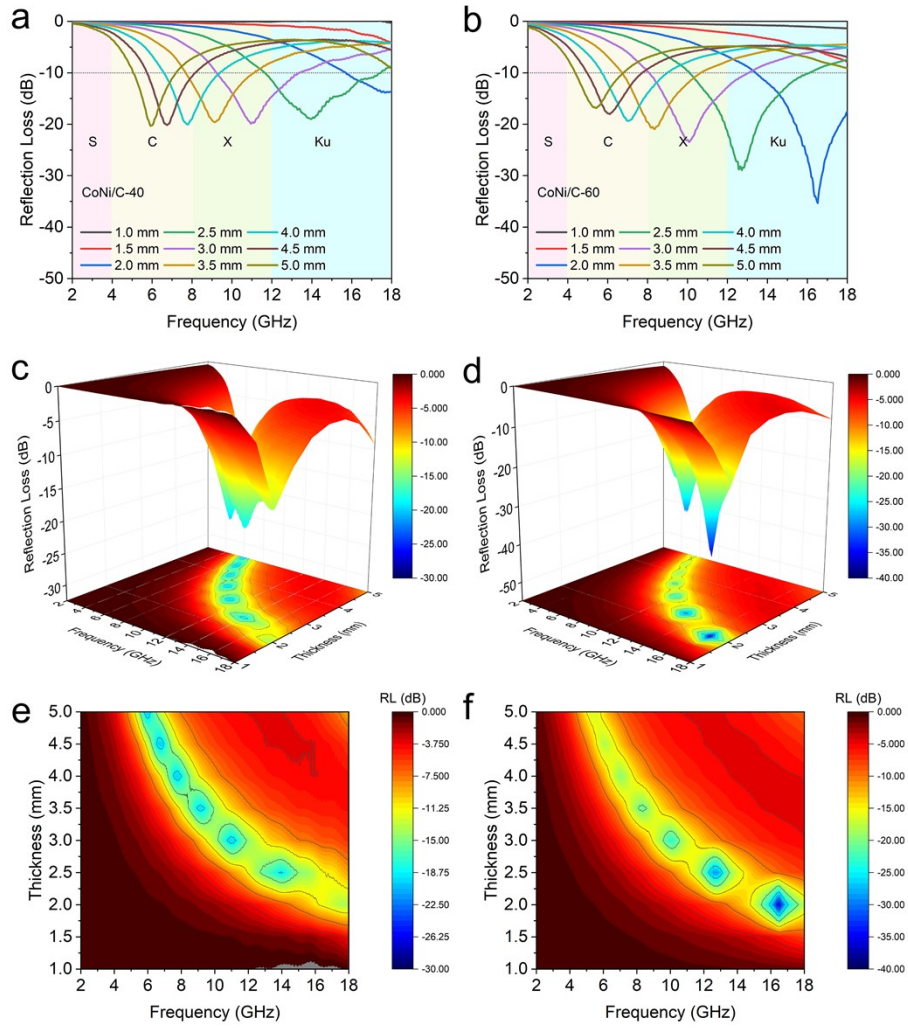

**Fig. S7.** Calculated RL curves at different thicknesses of (a) CoNi/C-40 and (c) CoNi/C-60.

The corresponding three-dimensional (3D) and contour RL representations of (c,e) CoNi/C-40 and (d,f) CoNi/C-60.



**Table S1.** Surface elemental contents of C, O, Co, and Ni in the composites from XPS spectra.

| Composites | C     | O     | Co    | Ni    |
|------------|-------|-------|-------|-------|
|            | at%   | at%   | at%   | at%   |
| CoNi/C-500 | 41.46 | 34.79 | 12.34 | 11.41 |
| CoNi/C     | 44.69 | 33.23 | 10.93 | 11.15 |
| CoNi/C-700 | 46.27 | 35.47 | 8.41  | 9.85  |

**Table S2.** Comparison for the electromagnetic wave absorption performance of CoNi/C with other MOF-based absorbers.

| Composites                              | RL <sub>min</sub> (dB) | Matching EAB (GHz) | References |
|-----------------------------------------|------------------------|--------------------|------------|
| Co/Co <sub>3</sub> O <sub>4</sub> @HCNs | -50.6                  | 6.6                | [1]        |
| CoZn/C@MoS <sub>2</sub> @PPy            | -49.18                 | 4.56               | [2]        |
| Ni-MOF@N-C-500                          | -69.6                  | 6.8                | [3]        |
| Ni@C@ZnO                                | -55.8                  | 4.1                | [4]        |
| DM-700                                  | -65.2                  | 4.8                | [5]        |
| CNT/FeCoNi@C                            | -51.7                  | 6.0                | [6]        |
| DM-700-3                                | -67.5                  | 2.0 (5.0-7.0)      | [7]        |
| Co-C composite                          | -48.5                  | 6.1 (14.6-8.5)     | [8]        |
| Cu-S-MOF                                | -52.8                  | 6.72 (9.68-16.4)   | [9]        |
| CoFe@C                                  | -61.8                  | 9.2 (8.8-18.0)     | [10]       |
| Co <sub>1</sub> Fe <sub>3</sub> @C/RC   | -20.2                  | 10.0 (8.0-18.0)    | [11]       |
| CoNi/C                                  | -50.8                  | 4.77 (12.99-17.76) | This work  |

## References

1. H. Xu, G. Zhang, Y. Wang, M. Ning, B. Ouyang, Y. Zhao, Y. Huang and P. Liu, *Nano-Micro Lett.*, 2022, **14**, 102.
2. Y. Bi, M. Ma, Y. Liu, Z. Tong, R. Wang, K. L. Chung, A. Ma, G. Wu, Y. Ma, C. He, P. Liu and L. Hu, *J. Colloid Interface Sci.*, 2021, **600**, 209 – 218.
3. R. Jiang, Y. Wang, J. Wang, Q. He and G. Wu, *J. Colloid Interface Sci.*, 2023, **648**, 25–36.
4. L. Wang, X. Yu, X. Li, J. Zhang, M. Wang and R. Che, *Chem. Eng. J.*, 2020, **383**, 123099.
5. F. Wu, Q. Li, Z. Liu, T. Shah, M. Ahmad, Q. Zhang and B. Zhang, *Carbon*, 2021, **182**, 484–496.
6. Q. Hu, R. Yang, S. Yang, W. Huang, Z. Zeng and X. Gui, *ACS Appl. Mater. Interfaces*, 2022, **14**, 10577–10587.
7. F. Wu, L. Wan, Q. Li, Q. Zhang and B. Zhang, *Compos. Part B: Eng.*, 2022, **236**, 109839.
8. Q. Ma, R. Qiang, Y. Shao, X. Yang, R. Xue, B. Chen, Y. Chen and S. Feng, *J. Colloid Interface Sci.*, 2023, **651**, 106–116.
9. P. Miao, N. Qu, W. Chen, T. Wang, W. Zhao and J. Kong, *Chem. Eng. J.*, 2023, **454**, 140445.
10. L. Wang, B. Wen, H. Yang, Y. Qiu and N. He, *Compos. Part A: Appl. Sci. Manuf.*, 2020, **135**, 105958.
11. Y. Zhang, S. Gao, J. He, F. Wei and X. Zhang, *Diamond Relat. Mater.*, 2024, **141**,

110666.
